# Supplementary material for: Cytomembrane-mimicking nanocarriers with a scaffold consisting of a CD44-targeted endogenous component for effective asparaginase supramolecule delivery
Source: Royal Society of Chemistry journal article supplement (doi:10.1039/d0nr02588g), 2020-01-01
Supplement: d0nr02588g1.pdf [file d0nr02588g1.pdf]

## **Supporting Information**

**Cytomembrane-mimicking nanocarriers with a scaffold consisting of a CD44-targeted endogenous component for effective asparaginase supramolecule delivery**

**Supplementary Information includes:**

**Methods**

**Table S1-S4**

**Figure S1-S3**

## Methods

### 1. Preparation of HA-g-PEG

**General methods.** NMR spectra were recorded with tetramethylsilane as the internal standard. <sup>1</sup>H NMR spectra were recorded at 600 MHz (Agilent, USA). Chemical shifts are reported in ppm downfield from CDCl<sub>3</sub> ( $\delta$  = 7.26 ppm) for <sup>1</sup>H NMR spectroscopy. D<sub>2</sub>O was used as solvent for HA and HA-g-PEG, and CHCl<sub>3</sub> for mPEG-glycine-Boc and mPEG-glycine. FT-IR was recorded at room temperature on a Thermo Scientific Nicolet iS50FT-IR spectrometer (USA) using KBr discs in the range of 400-4000 cm<sup>-1</sup> region. Differential scanning calorimetry (DSC) and thermal gravimetric analysis (TGA) were performed on a simultaneous thermal analyzer STA 449C (NETZSCH, Germany) at the heating rate of 10 °C /min under N<sub>2</sub> atmosphere in the temperature range of 25-500 °C.

**Synthesis of mPEG-glycine-Boc.** Dry mPEG (5.0 g, 2.5 mmol) and *N*-Boc-glycine (0.47 g, 2.7 mmol) was dissolved in 30 mL dichloromethane (DCM), after which 4-(dimethylamino) pyridine (DMAP, 0.09 g, 0.75 mmol) and dicyclohexylcarbodiimide (DCC, 0.62 g, 3.0 mmol) were added in portions at 0 °C. The reaction mixture was then stirred at 0 °C for 24 h. After completion, the precipitated white solid was removed by filtration. The filtrate was then evaporated under vacuum. The obtained residue was purified by recrystallization using acetone. The crystallized white solid was removed by filtration and the filtrate was evaporated and dried to provide mPEG-glycine-Boc as pale yellow solid, 2.23 g, 41.1% yield.

**Synthesis of mPEG-glycine.** mPEG-glycine-Boc (0.5 g, 0.25 mmol) was dissolved in DCM/trifluoroacetic acid (TFA, 1:1) and stirred for 2-3 h. After completion, most of the solvents were removed by evaporation under vacuum. The oily residue was then dissolved in 10 mL NaCl (15%). Adjust the pH of the solution to ~5.0 using 1.0 M NaOH. The insoluble white solid was filtrated and the filtrate was then extracted using CHCl<sub>3</sub> (10 mL X 3 times). The organic layer was combined, dried over Na<sub>2</sub>SO<sub>4</sub>, and evaporated under vacuum. The residue was dried over P<sub>2</sub>O<sub>5</sub> to provide mPEG-glycine as pale yellow oil, 0.27 g, 60.3% yield.

**Synthesis of HA-g-PEG.** *N*-hydroxysuccinimide (NHS, 14.386 mg, 0.125 mmol) and 1-(3-Dimethylaminopropyl)-3-ethylcarbodiimide (EDC, 47.925 mg, 0.25 mmol) were dissolved in 5 mL hyaluronic acid (HA) aqueous solution (2%, w/v) and stirred for 1 h to form a homogeneous mixture. After that 0.859 mL mPEG-glycine aqueous solution (2%, w/v) was added, stirred under room temperature for 12 h. The reaction mixture was purified by dialysis in water for 72 h (dialysis bag: MWCO 8000-14000). The solution was then evaporated under vacuum and the obtained solid was dried, washed by acetone and CHCl<sub>3</sub> (5 mL, 3 times each). Dry under vacuum to provide the product as pale yellow solid, 0.09 g, 75.9% yield.

### 2. Preparation of Asp-Cy5.5 and A-S-CmN-Cy5.5

Asp-Cy5.5 was prepared by stirring method, in short, 16  $\mu$ L of dimethylformamide containing 0.670  $\mu$ mol Cy5.5-NHS was mixed with 64  $\mu$ L of Tris-HCL buffer (50 mmol/L, pH 7.3) consisting of 0.017  $\mu$ mol Asp. The mixture was allowed to stir magnetically at room temperature in the dark for 24 h. The final mixture was dialyzed against deionized water for 72 h, and then freeze-dried to obtain Asp-Cy5.5.

A-S-CmN-Cy5.5 was prepared according to the preparation method of A-S-CmN (Asp was replaced by Asp-Cy5.5).

## **Table S1-S4**

**Table S1.** Bioequivalence evaluation of A-S-CmN and free Asp.

**Table S2.** The fluorescence intensity at maximum wavelength when the mixture of Asp and BSA was set at different ratios.

**Table S3.** The fluorescence intensity at maximum wavelength when the mixture of B-A-S-CmN and BSA was set at different ratios.

**Table S4.** The fluorescence intensity at maximum wavelength when the mixture of A-S-CmN and BSA was set at different ratios.

**Table S1.** Bioequivalence evaluation of A-S-CmN and free Asp.

| Parameter                   | 90% confidential interval calculated | Bioequivalence standard | <i>P</i> value calculated | Bioequivalence |
|-----------------------------|--------------------------------------|-------------------------|---------------------------|----------------|
| $AUC_{(0-48h)}$ (U/mL·h)    | 77.0%~78.5%                          | 80~125%                 | -                         | No             |
| $AUC_{(0-\infty)}$ (U/mL·h) | 77.0%~78.5%                          | 80~125%                 | -                         | No             |
| $C_{max}$ (U/mL·h)          | 94.4%~96.0%                          | 70% ~143%               | -                         | Yes            |
| $T_{max}$ (h)               | -                                    | > 0.05                  | 0.001                     | No             |

In total: Free Asp was not equivalent to A-S-CmN, and A-S-CmN was better.

**Table S2.** The fluorescence intensity at maximum wavelength when the mixture of Asp and BSA was set at different ratios.

| Concentration | Asp               |         | Mixture of Asp and BSA |                   |         | $F_3^e$ |
|---------------|-------------------|---------|------------------------|-------------------|---------|---------|
|               | $\lambda_{max}^a$ | $F_1^b$ | Ratio (BSA:Asp)        | $\lambda_{max}^c$ | $F_2^d$ |         |
| -             | -                 | -       | 1:0 (BSA 0.5 $\mu$ M)  | 343 nm            | 177.376 | -       |
| 2 $\mu$ M     | 328 nm            | 59.157  | 1:4                    | 338 nm            | 243.221 | 236.533 |
| 3 $\mu$ M     | 328 nm            | 87.720  | 1:6                    | 335 nm            | 270.969 | 265.096 |
| 4 $\mu$ M     | 319 nm            | 119.192 | 1:8                    | 333 nm            | 289.929 | 296.568 |
| 5 $\mu$ M     | 320 nm            | 147.455 | 1:10                   | 333 nm            | 322.423 | 324.831 |
| 6 $\mu$ M     | 319 nm            | 176.866 | 1:12                   | 335 nm            | 352.706 | 354.242 |

<sup>a</sup>Fluorescence maximum wavelength of Asp

<sup>b</sup>Fluorescence intensity of Asp at maximum wavelength

<sup>c</sup>Fluorescence maximum wavelength of BSA or the mixture of Asp and BSA

<sup>d</sup>Fluorescence intensity of mixture of Asp and BSA at maximum wavelength

<sup>e</sup>Fluorescence intensity of Asp plus fluorescence intensity of BSA at maximum wavelength

**Table S3.** The fluorescence intensity at maximum wavelength when the mixture of B-A-S-CmN and BSA was set at different ratios.

| B-A-S-CmN     |                               |                             | Mixture of B-A-S-CmN and BSA |                               |                             | F <sub>3</sub> <sup>e</sup> |
|---------------|-------------------------------|-----------------------------|------------------------------|-------------------------------|-----------------------------|-----------------------------|
| Concentration | $\lambda_{\max}$ <sup>a</sup> | F <sub>1</sub> <sup>b</sup> | Ratio (BSA:B-A-S-CmN)        | $\lambda_{\max}$ <sup>c</sup> | F <sub>2</sub> <sup>d</sup> |                             |
| -             | -                             | -                           | 1:0 (BSA 0.5 $\mu$ M)        | 343 nm                        | 177.376                     | -                           |
| 2 $\mu$ M     | 330 nm                        | 12.089                      | 1:4                          | 343 nm                        | 666.690                     | 189.465                     |
| 3 $\mu$ M     | 330 nm                        | 15.775                      | 1:6                          | 343 nm                        | 626.148                     | 193.151                     |
| 4 $\mu$ M     | 330 nm                        | 13.244                      | 1:8                          | 343 nm                        | 500.572                     | 190.62                      |
| 5 $\mu$ M     | 330 nm                        | 17.378                      | 1:10                         | 343 nm                        | 592.572                     | 194.754                     |
| 6 $\mu$ M     | 331 nm                        | 15.102                      | 1:12                         | 343 nm                        | 508.136                     | 192.478                     |

<sup>a</sup>Fluorescence maximum wavelength of B-A-S-CmN

<sup>b</sup>Fluorescence intensity of B-A-S-CmN at maximum wavelength

<sup>c</sup>Fluorescence maximum wavelength of BSA or the mixture of B-A-S-CmN and BSA

<sup>d</sup>Fluorescence intensity of mixture of B-A-S-CmN and BSA at maximum wavelength

<sup>e</sup>Fluorescence intensity of B-A-S-CmN plus fluorescence intensity of BSA at maximum wavelength

**Table S4.** The fluorescence intensity at maximum wavelength when the mixture of A-S-CmN and BSA was set at different ratios.

| A-S-CmN       |                               |                             | Mixture of A-S-CmN and BSA |                               |                             | F <sub>3</sub> <sup>e</sup> |
|---------------|-------------------------------|-----------------------------|----------------------------|-------------------------------|-----------------------------|-----------------------------|
| Concentration | $\lambda_{\max}$ <sup>a</sup> | F <sub>1</sub> <sup>b</sup> | Ratio (BSA: A-S-CmN)       | $\lambda_{\max}$ <sup>c</sup> | F <sub>2</sub> <sup>d</sup> |                             |
| -             | -                             | -                           | 1:0 (BSA 0.5 $\mu$ M)      | 343 nm                        | 177.376                     | -                           |
| 2 $\mu$ M     | 329 nm                        | 94.109                      | 1:4                        | 340 nm                        | 771.152                     | 271.485                     |
| 3 $\mu$ M     | 330 nm                        | 105.828                     | 1:6                        | 338 nm                        | 668.905                     | 283.204                     |
| 4 $\mu$ M     | 329 nm                        | 172.411                     | 1:8                        | 338 nm                        | 831.375                     | 349.787                     |
| 5 $\mu$ M     | 330 nm                        | 167.34                      | 1:10                       | 335 nm                        | 733.619                     | 344.716                     |
| 6 $\mu$ M     | 328 nm                        | 250.999                     | 1:12                       | 334 nm                        | 960.857                     | 428.375                     |

<sup>a</sup>Fluorescence maximum wavelength of A-S-CmN

<sup>b</sup>Fluorescence intensity of A-S-CmN at maximum wavelength

<sup>c</sup>Fluorescence maximum wavelength of BSA or the mixture of A-S-CmN and BSA

<sup>d</sup>Fluorescence intensity of mixture of A-S-CmN and BSA at maximum wavelength

<sup>e</sup>Fluorescence intensity of A-S-CmN plus fluorescence intensity of BSA at maximum wavelength

## **Figure S1-S3**

**Figure S1.** MALDI-TOF spectra of HA-g-PEG.

**Figure S2.** Size and Zeta potential of A-S-CmN.

**Figure S3.** Protein-protein docking analysis of interaction between Asp and BSA.

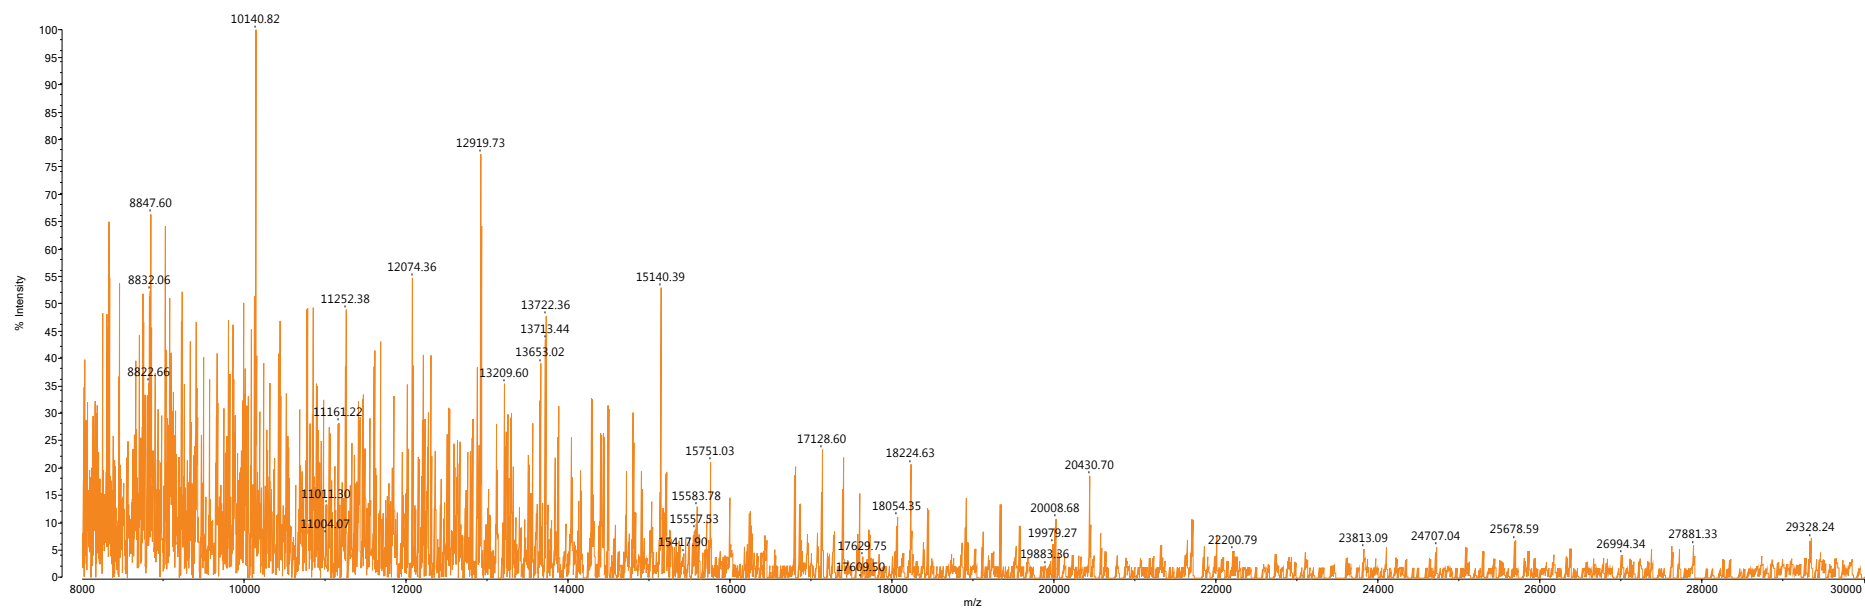

Figure S1. MALDI-TOF spectra of HA-g-PEG.



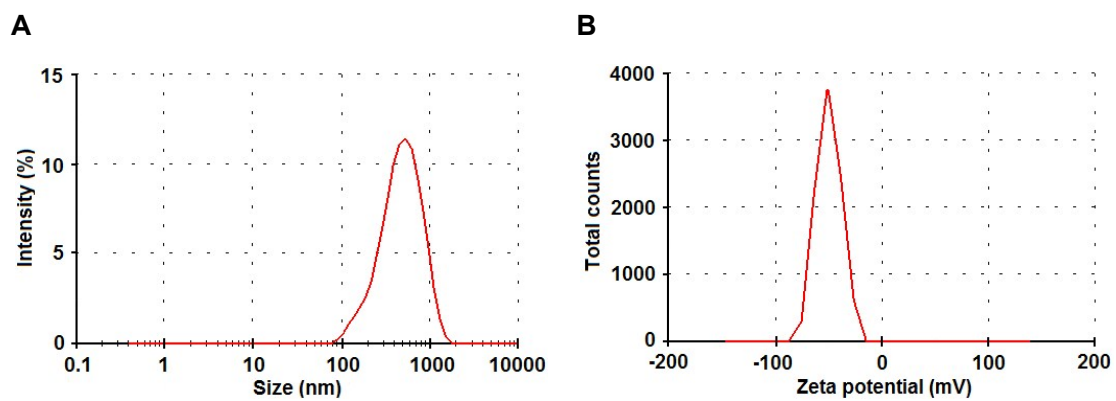

**Figure S2. Size and Zeta potential of A-S-CmN.** (A) Size distribution of A-S-CmN. (B) Zeta potential of A-S-CmN.

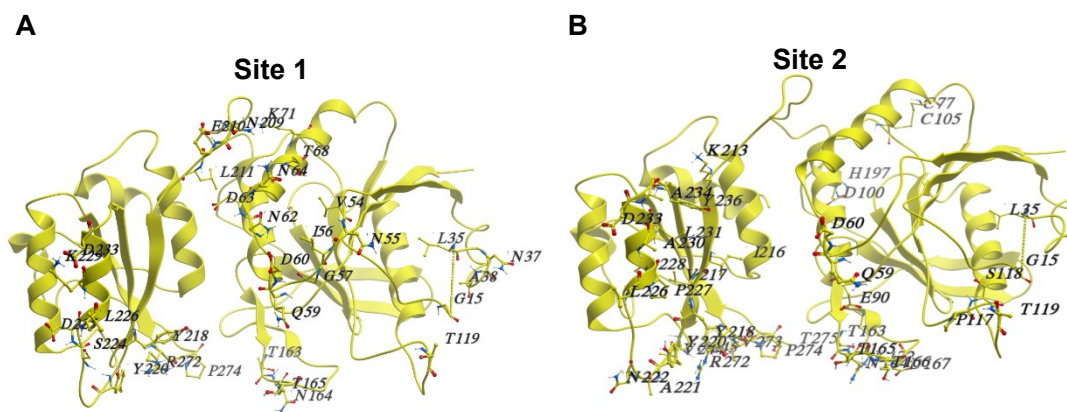

**Figure S3. Protein-protein docking analysis of interaction between Asp and BSA.**  
 (A,B) Binding interface of Asp to BSA binding site (A) 1 and (B) 2, residues at the interface are shown as the “CPK” illustration.
